# Supplementary material for: GeSe-evoked synchronous strategy for electrodeposited CZGSe solar cells
Source: Royal Society of Chemistry journal article supplement (doi:10.1039/d2nr07285h), 2023-01-01
Supplement: d2nr07285h1.pdf [file d2nr07285h1.pdf]

## **Electronic Supplementary Information**

### **GeSe-Evoked Synchronous Strategy for Electrodeposited CZGSe Solar Cells**

Jingling Liu,<sup>a</sup> Kang Gao,<sup>a</sup> Hang Cai,<sup>a</sup> Xinyu Wu,<sup>a</sup> Xinsheng Liu,<sup>a</sup> Ke Cheng<sup>\*a</sup> and Zuliang Du<sup>\*a</sup>

<sup>a</sup> Key Laboratory for Special Functional Materials of Ministry of Education, National & Local Joint Engineering Research Center for High-efficiency Display and Lighting Technology, School of Materials Science and Engineering, and Collaborative Innovation Center of Nano Functional Materials and Applications, Henan University, Kaifeng 475004, China

#### **Corresponding Author**

<sup>\*</sup>[zld@henu.edu.cn](mailto:zld@henu.edu.cn), [ck@henu.edu.cn](mailto:ck@henu.edu.cn)

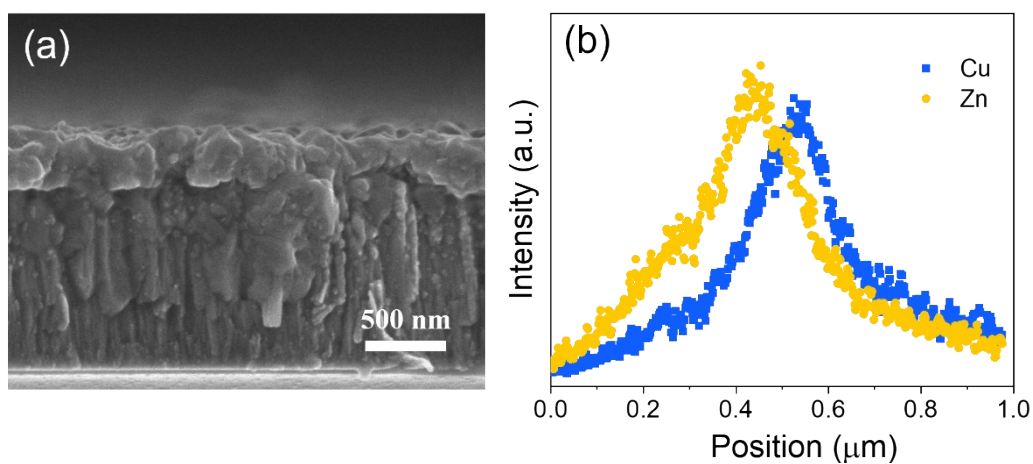

**Figure S1.** (a) Cross-sectional SEM image and (b) EDX line profiles of the preformed Cu-Zn layer.

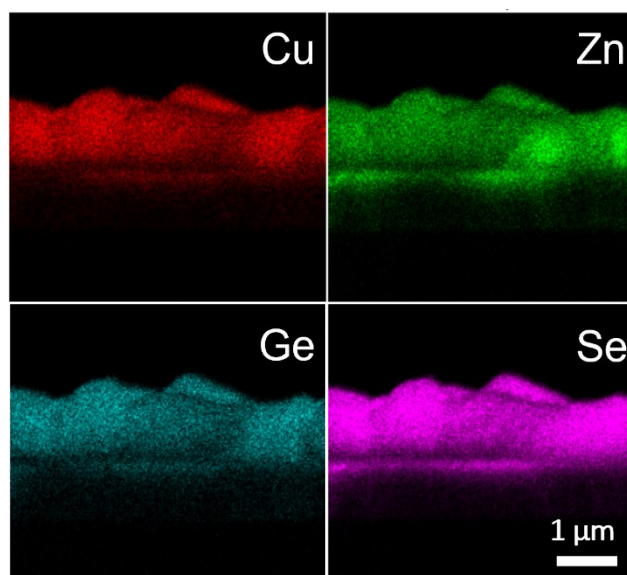

**Figure S2.** EDX mappings of the CZGSe-B absorber layer.

**Table S1.** Elemental composition of CZGSe-A and CZGSe-B absorber layer.

| Samples | Cu (%) | Zn (%) | Ge (%) | Se (%) | Cu/Zn+Ge | Zn/Ge |
|---------|--------|--------|--------|--------|----------|-------|
| CZGSe-A | 23.06  | 13.61  | 11.13  | 52.20  | 0.93     | 1.22  |
| CZGSe-B | 19.91  | 15.92  | 13.59  | 50.58  | 0.67     | 1.17  |

**Table S2.** Device parameters of the CZGSe-A and CZGSe-B solar cells prepared at different selenized temperatures.

| Device  | Temperature (°C) | $V_{oc}$ (mV) | $J_{sc}$ (mA/cm <sup>2</sup> ) | FF (%) | Eff (%) |
|---------|------------------|---------------|--------------------------------|--------|---------|
| CZGSe-A | 480              | 400           | 8.28                           | 33.81  | 1.11    |
|         | 500              | 0.43          | 14.66                          | 33.78  | 2.14    |
|         | 520              | 370           | 8.58                           | 32.03  | 1.02    |
| CZGSe-B | 580              | 0.45          | 10.82                          | 45.50  | 2.21    |
|         | 600              | 0.49          | 16.53                          | 45.57  | 3.69    |
|         | 620              | 0.31          | 10.55                          | 39.35  | 1.29    |

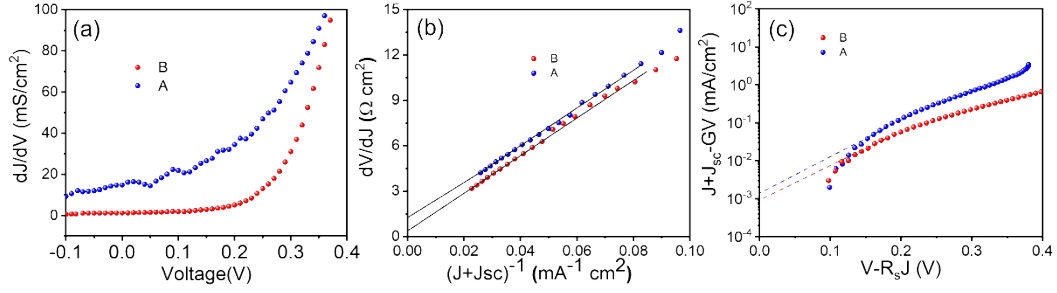

**Figure S3.** Plots of  $dJ/dV$  vs  $V$  (a),  $dV/dJ$  versus  $(J+J_{sc})^{-1}$ (b),  $J+J_{sc}-GV$  vs  $V-R_sJ$  (c)

extracted from the light  $J$ – $V$  curves, respectively.
